# Supplementary material for: Dissecting the Biochemical and Transcriptomic Effects of a Locally Applied Heat Treatment on Developing Cabernet Sauvignon Grape Berries
Source: Front Plant Sci. 2017 Jan 31;8:53. doi: 10.3389/fpls.2017.00053 (PMC5281624; doi:10.3389/fpls.2017.00053)
Supplement: Supplementary file 9 [file DataSheet9.XLSX]

## Sheet: Feuil1
Supplementary Table 9. Carotenoid metabolic gene expression in control or HT Cabernet sauvignon berries.
Expression: log2 fold change between HT and control; Green or red highlights indicate DEGs (log2 FC >1, p.adj.BH<0.05).
FC: Fold change; padjBH: Benjamini and Hochberg corrected p-values
Annotation according to		Green			Véraison			Ripening
Young et al., 2012		1 d	7 d	14d	1 d	7 d	14d	1 d	7 d	14d		Unique_ID				Functional annotation
		log2FC.green.HS_vs_control.d1.	log2FC.green.HS_vs_control.d7.	log2FC.green.HS_vs_control.d14.	log2FC.veraison.HS_vs_control.d1.	log2FC.veraison.HS_vs_control.d7.	log2FC.veraison.HS_vs_control.d14.	log2FC.middle_ripening.HS_vs_control.d1.	log2FC.middle_ripening.HS_vs_control.d7.	log2FC.middle_ripening.HS_vs_control.d14.	ID_Nimblegen	C12X_V1	BINCODE	NAME	DESCRIPTION	Grimplet et al., 2012	p.adj.BH.green.HS_vs_control.d1.	p.adj.BH.green.HS_vs_control.d7.	p.adj.BH.green.HS_vs_control.d14.	p.adj.BH.veraison.HS_vs_control.d1.	p.adj.BH.veraison.HS_vs_control.d7.	p.adj.BH.veraison.HS_vs_control.d14.	p.adj.BH.middle_ripening.HS_vs_control.d1.	p.adj.BH.middle_ripening.HS_vs_control.d7.	p.adj.BH.middle_ripening.HS_vs_control.d14.
VvPSY1	phytoene synthase (PSY)	-0.25636	-0.164445	-0.517127	-0.128233	-0.1995	-0.042549	-0.865008	-0.382836	0.548079	CHR4_JGVV79_53_T01	VIT_04s0079g00680	16.1.4.1	secondary metabolism.isoprenoids.carotenoids.phytoene synthase	phytoene synthase (PSY) / geranylgeranyl-diphosphate geranylgeranyl transferase | chr5:5659613-5662865 REVERSE	Phytoene synthase, chloroplast precursor	0.512019	0.250233	0.931325	0.0888354	0.709036	0.997162	0.0719917	0.0237864	0.762702
VvPSY2	phytoene synthase (PSY)	-0.420935	-1.08396	-0.0426437	-1.82731	-0.706125	-0.327762	-0.85472	-0.355325	0.424185	CHR12_JGVV28_288_T01	VIT_12s0028g00960	16.1.4.1	secondary metabolism.isoprenoids.carotenoids.phytoene synthase	phytoene synthase (PSY) / geranylgeranyl-diphosphate geranylgeranyl transferase | chr5:5659613-5662865 REVERSE	Phytoene synthase, chloroplast precursor	0.0241112	2.0963e-05	0.0518719	0.409601	0.582064	0.617098	0.925954	0.766329	0.430393
VvPSY3	phytoene synthase (PSY)	-0.562481	-0.460106	-0.580057	-1.35321	-1.2141	-2.14983	-0.763583	-1.1118	-1.13086		VIT_06s0004g00820	16.1.4.1	secondary metabolism.isoprenoids.carotenoids.phytoene synthase	phytoene synthase (PSY) / geranylgeranyl-diphosphate geranylgeranyl transferase | chr5:5659613-5662865 REVERSE	Ribosomal protein S2; Squalene/phytoene synthase	0.05976	0.000587887	0.00131094	0.000103255	0.826239	0.000316259	0.0416908	0.0224477	0.0326405
VvPDS1	phytoene desaturase (PDS)	0.0237494	-0.396982	0.156809	-0.344153	0.0753517	0.114657	0.109314	-0.14607	-0.233352	CHR9_JGVV2_7_T01	VIT_09s0002g00100	16.1.4.2	secondary metabolism.isoprenoids.carotenoids.phytoene dehydrogenase	Symbols: PDS3, PDS, PDE226 | PDS3 (PHYTOENE DESATURASE 3); phytoene dehydrogenase | chr4:8190212-8195265 REVERSE	Phytoene desaturase	0.940023	0.0481773	0.12232	0.249475	0.0460126	8.86279e-09	0.460915	5.51186e-07	3.68858e-07
VvPDH2	phytoene dehydrogenase-related (PDH)	0.0399524	0.215554	0.446232	0.410455	0.0522498	0.0826299	-1.02083	-0.395081	-0.0467661	CHR4_JGVV23_199_T01	VIT_04s0023g01790	16.1.4	secondary metabolism.isoprenoids.carotenoids	amine oxidase-related | chr5:20107229-20110636 REVERSE	Phytoene dehydrogenase	0.936038	7.32166e-09	6.54041e-05	1.73956e-14	1.23603e-08	1.62327e-08	1.26508e-10	1.58696e-13	4.0637e-11
VvPDH1	phytoene dehydrogenase-related (PDH)	-0.137667	-0.44428	0.133057	0.0154525	0.116914	0.341664	-0.466689	0.0133706	0.0267474	CHR4_JGVV23_200_T01	VIT_04s0023g01780	16.1.4	secondary metabolism.isoprenoids.carotenoids	amine oxidase-related | chr5:20107229-20110636 REVERSE	Phytoene dehydrogenase	0.507513	0.0617947	0.211192	0.0949471	0.0702041	0.369826	0.00153155	0.00152729	0.12909
VvZISO1	15-cis-ζ-carotene isomerase (Z-ISO)	0.124873	0.0809503	-0.0249252	0.0541187	-0.22212	0.0789012	-0.229649	-0.596935	-0.312026	CHR5_JGVV62_90_T01	VIT_05s0062g01110	34.14	transport.unspecified cations	sodium symporter-related | chr1:3605576-3607493 REVERSE	Sodium symporter	0.378947	0.881431	0.813357	0.316745	0.0173016	0.816153	0.736183	0.00163535	0.0915284
VvZDS1	ζ-carotene desaturase (ZDS)	-0.0326322	0.219211	0.351196	-1.06011	-0.661585	-0.712737	-1.19544	-0.688678	0.35684	CHR14_JGVV30_54_T01	VIT_14s0030g01740	16.1.4.3	secondary metabolism.isoprenoids.carotenoids.zeta-carotene desaturase	Symbols: ZDS, PDE181 | ZDS (ZETA-CAROTENE DESATURASE); carotene 7,8-desaturase | chr3:1342718-1346387 FORWARD	Zeta-carotene desaturase ZDS1	0.920513	6.91079e-08	0.197667	2.02449e-09	0.000670166	0.000417324	2.97719e-07	2.69057e-10	3.18815e-11
VvCISO1	carotenoid isomerase (CISO2)	-0.240128	-1.15258	-0.466506	-0.609899	-0.245712	-0.117397	-0.850888	-0.270158	0.07317	CHR8_JGVV32_65_T01	VIT_08s0032g00800	16.1.4	secondary metabolism.isoprenoids.carotenoids	Symbols: CRTISO, CCR2 | CRTISO (CAROTENOID ISOMERASE); carotenoid isomerase | chr1:2092946-2096232 REVERSE	Carotenoid isomerase, chloroplast precursor	0.0676439	0.652854	0.189594	0.00236858	0.191832	0.000868594	0.00773731	2.81186e-06	0.000172492
VvCISO2	carotenoid isomerase (CISO1)	-1.23262	-1.12914	-0.736831	-1.14715	-0.324859	0.221275	-0.773237	-0.157313	-0.343092	CHR12_JGVV35_105_T01	VIT_12s0035g01080	16.1.4	secondary metabolism.isoprenoids.carotenoids	amine oxidase family | chr1:21395196-21398280 FORWARD	Carotenoid isomerase 1, chloroplast precursor	7.93754e-08	0.481122	0.0138878	4.00037e-07	0.0045285	0.070231	0.080998	0.101488	0.248448
VvLBCY1	lycopene β-cyclase (LBCY2)	-0.161715	-0.334125	0.141587	-0.159617	-0.311814	0.139179	-1.16195	-1.31975	-0.53012	CHR6_JGVV80_42_T01	VIT_06s0080g00810	16.1.4.5	secondary metabolism.isoprenoids.carotenoids.lycopene beta cyclase	Symbols: LYC | LYC (LYCOPENE CYCLASE); lycopene beta cyclase | chr3:3164075-3166038 REVERSE	Lycopene beta cyclase (LYC)	0.468603	6.77988e-10	0.0933756	0.175641	0.0382829	0.682841	0.000404331	0.946501	0.478511
VvLBCY2	lycopene β-cyclase (LBCY1)	-0.605818	-0.603919	-0.44815	-0.619098	-0.234994	-0.264241	-0.46268	-0.315918	0.362714	CHR8_JGVV7_313_T01	VIT_08s0007g05690	16.1.4.5	secondary metabolism.isoprenoids.carotenoids.lycopene beta cyclase	Symbols: LYC | LYC (LYCOPENE CYCLASE); lycopene beta cyclase | chr3:3164075-3166038 REVERSE	Lycopene beta cyclase, chloroplast precursor	1.93664e-05	0.578612	0.381144	0.000510793	0.040701	0.821918	6.71596e-05	2.20364e-05	0.104292
VvLECY1	lycopene epsilon-cyclase (LECY)	-0.344901	-1.35384	-0.300001	0.716035	0.505011	0.87755	-0.571996	-0.513539	-0.19343	CHR11_JGVV16_157_T01	VIT_11s0016g01880	16.1.4.4	secondary metabolism.isoprenoids.carotenoids.lycopene epsilon cyclase	Symbols: LUT2 | LUT2 (LUTEIN DEFICIENT 2); lycopene epsilon cyclase | chr5:23077265-23080053 FORWARD	Lycopene epsilon cyclase, chloroplast precursor	0.0703386	0.97603	0.541771	0.0461768	0.180272	0.100219	7.51795e-07	2.6753e-05	3.00401e-05
VvLUT1	carotene hydroxylase (CYP97C1; LUT1)	-0.132138	-0.362928	-0.352817	-0.63868	0.0267095	0.111959	-0.880747	-0.167905	-0.73768	CHR8_JGVV7_421_T01	VIT_08s0007g04530	26.10	misc.cytochrome P450	Symbols: LUT1, CYP97C1 | LUT1 (LUTEIN DEFICIENT 1); epsilon hydroxylase/ oxygen binding | chr3:19692771-19697542 FORWARD	Carotene hydroxylase Epsilon-ring	0.565491	0.000755733	0.700337	0.0361722	0.878981	0.87137	0.779743	0.982599	0.10846
VvLUT5	carotene hydroxylase (CYP97A3; LUT5)	-0.168601	-0.630894	0.176225	-0.279007	-0.0377961	-0.506969	-0.21133	-0.194561	-1.65435	CHR4_JGVV23_337_T01	VIT_04s0023g00080	26.10	misc.cytochrome P450	Symbols: CYP97A3, LUT5 | CYP97A3 (CYTOCHROME P450-TYPE MONOOXYGENASE 97A3); carotene beta-ring hydroxylase/ oxygen binding | chr1:11396402-11399714 FORWARD	CYP97B	0.160053	0.058797	0.748691	0.785716	0.369272	0.0334649	0.013504	0.187929	0.299305
VvBCH1	β-carotene hydroxylase (BCH1)	-0.240094	0.314146	-0.262123	-1.55815	-0.391778	-0.66655	-1.37528	-2.1322	1.5883	CHR2_JGVV25_22_T01	VIT_02s0025g00240	16.1.4	secondary metabolism.isoprenoids.carotenoids	Symbols: BETA-OHASE 2, B2, CHY2 | BETA-OHASE 2 (BETA-CAROTENE HYDROXYLASE 2); carotene beta-ring hydroxylase | chr5:21334793-21337002 REVERSE	Beta-carotene hydroxylase	0.647127	0.0831487	0.392141	0.255803	0.857382	0.801489	0.502814	0.541288	0.848625
VvBCH2	β-carotene hydroxylase (BCH2)	1.24511	3.02081	1.65076	0.866693	0.98973	0.768666	0.911286	1.0705	-0.244669	CHR16_JGVV50_151_T01	VIT_16s0050g01090	16.1.4	secondary metabolism.isoprenoids.carotenoids	Symbols: BETA-OHASE 2, B2, CHY2 | BETA-OHASE 2 (BETA-CAROTENE HYDROXYLASE 2); carotene beta-ring hydroxylase | chr5:21334793-21337002 REVERSE	Beta-carotene hydroxylase	5.22902e-08	1.07069e-16	0.00141722	0.0626892	0.980893	0.562192	0.00999198	0.864014	0.0180398
VvZEP1	zeaxanthin epoxidase (ZEP; ABA1)	-0.524362	-0.489951	-0.387098	-0.00116594	-0.0980162	0.100037	-0.192139	-0.19637	-0.151525	CHR7_JGVV31_55_T01	VIT_07s0031g00620	17.1.1.1.1	hormone metabolism.abscisic acid.synthesis-degradation.synthesis.zeaxanthin epoxidase	Symbols: ABA1, LOS6, NPQ2, ATABA1, ZEP, IBS3, ATZEP | ABA1 (ABA DEFICIENT 1); zeaxanthin epoxidase | chr5:26753510-26757236 REVERSE	Zeaxanthin epoxidase (ZEP) (ABA1)	0.01803	1.53445e-05	0.110675	0.000144995	0.750334	0.00633314	8.50915e-09	1.99094e-06	0.330037
VvZEP2	zeaxanthin epoxidase (ZEP; ABA1)	0.227929	0.253514	0.197518	0.395904	0.093827	0.460575	-0.893836	-0.585598	-0.153417	CHR13_JGVV156_33_T01	VIT_13s0156g00350	17.1.1.1.1	hormone metabolism.abscisic acid.synthesis-degradation.synthesis.zeaxanthin epoxidase	Symbols: ABA1, LOS6, NPQ2, ATABA1, ZEP, IBS3, ATZEP | ABA1 (ABA DEFICIENT 1); zeaxanthin epoxidase | chr5:26753510-26757236 REVERSE	Zeaxanthin epoxidase (ZEP) (ABA1)	0.0663326	6.00719e-05	0.00320227	0.917561	8.31964e-05	6.33226e-05	0.379854	0.0145286	0.905317
VvVDE1	violaxanthin de-epoxidase (VDE1)	-0.305459	-0.932225	-0.0218759	0.428925	0.580291	0.881691	-0.599779	0.123673	0.800545	CHR4_JGVV43_68_T01	VIT_04s0043g01010	16.1.4.21	secondary metabolism.isoprenoids.carotenoids.violaxanthin de-epoxidase	Symbols: NPQ1, AVDE1 | NPQ1 (NON-PHOTOCHEMICAL QUENCHING 1); violaxanthin de-epoxidase | chr1:2706924-2709531 FORWARD	Violaxanthin de-epoxidase	0.254151	1.68416e-07	0.0153713	0.120365	0.0227231	0.270767	0.053341	0.00110871	0.000243095
VvVDE2	violaxanthin de-epoxidase (VDE2)	0.309824	0.74592	0.340756	0.43272	0.486137	0.687196	0.265767	0.175651	0.151838	CHR7_JGVV31_158_T01	VIT_07s0031g01770	16.1.4.21	secondary metabolism.isoprenoids.carotenoids.violaxanthin de-epoxidase	violaxanthin de-epoxidase-related | chr2:9318258-9320002 REVERSE	Violaxanthin de-epoxidase	0.0519066	3.40291e-09	0.722137	0.872154	0.778877	0.969473	0.822708	0.808907	0.345787
VvNSY1	neoxanthin synthase (NSY)	-0.141098	0.605814	-0.113003	-0.977406	-0.469138	-0.281819	-1.07089	-0.797278	0.0159202	CHR14_JGVV6_184_T01	VIT_14s0006g02880	35.2	not assigned.unknown	Symbols: ABA4 | ABA4 (abscisic acid (ABA)-deficient 4); intramolecular oxidoreductase | chr1:25045225-25046860 REVERSE	Unknown protein	0.688943	0.0153612	0.411621	0.859788	0.00833628	0.44421	0.0054662	0.000954005	0.815535
VvNCED1	11,12 9-cis epoxycarotenoid dioxygenase (NCED1)	0.28947	2.46061	0.725047	-0.194384	-0.34334	-0.12715	-0.717844	-0.996139	0.623615	CHR5_JGVV51_51_T01	VIT_05s0051g00670	17.1.1.1.10	hormone metabolism.abscisic acid.synthesis-degradation.synthesis.9-cis-epoxycarotenoid dioxygenase	Symbols: NCED6, ATNCED6 | NCED6 (NINE-CIS-EPOXYCAROTENOID DIOXYGENASE 6); 9-cis-epoxycarotenoid dioxygenase | chr3:8761434-8763172 FORWARD	9-cis-epoxycarotenoid dioxygenase 4	0.737057	1.86474e-10	0.00949384	5.20862e-08	0.00652777	2.95016e-05	0.969521	6.53887e-06	0.114921
VvNCED2	11,12 9-cis epoxycarotenoid dioxygenase (NCED2)	-1.03242	-0.136459	-0.0362107	-1.29714	0.112659	0.258796	-1.19063	-0.285939	-0.497683	CHR10_JGVV3_335_T01	VIT_10s0003g03750	17.1.1.1.10	hormone metabolism.abscisic acid.synthesis-degradation.synthesis.9-cis-epoxycarotenoid dioxygenase	Symbols: NCED3, ATNCED3, STO1, SIS7 | NCED3 (NINE-CIS-EPOXYCAROTENOID DIOXYGENASE 3); 9-cis-epoxycarotenoid dioxygenase | chr3:4831288-4833599 REVERSE	9-cis-epoxycarotenoid dioxygenase 2	0.000288087	0.533404	0.404985	9.10834e-08	1.59919e-05	1.38482e-06	2.04705e-05	3.21753e-06	0.0143578
VvNCED3	11,12 9-cis epoxycarotenoid dioxygenase (NCED3)	-0.546594	1.63122	0.0624765	-0.608604	-1.13367	-0.46628	0.0381343	-1.67362	-0.103052	CHR19_JGVV93_38_T01	VIT_19s0093g00550	17.1.1.1.10	hormone metabolism.abscisic acid.synthesis-degradation.synthesis.9-cis-epoxycarotenoid dioxygenase	Symbols: NCED3, ATNCED3, STO1, SIS7 | NCED3 (NINE-CIS-EPOXYCAROTENOID DIOXYGENASE 3); 9-cis-epoxycarotenoid dioxygenase | chr3:4831288-4833599 REVERSE	9-cis-epoxycarotenoid dioxygenase 2	0.178652	0.0167533	0.375701	0.0458407	0.294967	0.555702	2.35539e-07	0.000692258	0.0407199
VvNCED4	11,12 9-cis epoxycarotenoid dioxygenase (NCED3)	-0.500498	-1.15588	-1.84262	0.0159179	-0.832065	-3.25694	-0.86538	-0.927686	-2.98233	CHR2_JGVV87_11_T01	VIT_02s0087g00910	17.1.1.1.10	hormone metabolism.abscisic acid.synthesis-degradation.synthesis.9-cis-epoxycarotenoid dioxygenase	Symbols: NCED4 | NCED4 (NINE-CIS-EPOXYCAROTENOID DIOXYGENASE 4) | chr4:10481786-10483857 FORWARD	9-cis-epoxycarotenoid dioxygenase	0.274993	1.66851e-13	0.0227024	7.35752e-05	0.206999	0.539054	0.404569	0.0156417	0.00136782
VvABA2	short-chain alcohol dehydrogenase (ABA2)	0.142285	-0.0796857	-0.110392	0.105304	0.107659	-0.04354	0.0110131	-0.0206901	0.442484	CHR6_JGVV80_22_T01	VIT_06s0080g01020	26.22	misc.short chain dehydrogenase/reductase (SDR)	short-chain dehydrogenase/reductase (SDR) family protein | chr3:19173622-19174667 REVERSE	Secoisolariciresinol dehydrogenase	0.583793	7.10802e-07	0.285894	0.886661	0.252402	0.0029071	0.85549	0.0134959	0.00905517
VvAAO3	abscisic aldehyde oxidase (AAO3)	-0.177198	-0.128165	0.278563	0.12173	-0.0663706	0.34545	-0.389638	-0.0446473	0.912738	CHR18_JGVV41_5_T01	VIT_18s0041g02430	26.1	misc.misc2	Symbols: AAO1, AO1, ATAO, ATAO1 | AAO1 (ARABIDOPSIS ALDEHYDE OXIDASE 1); aldehyde oxidase/ indole-3-acetaldehyde oxidase | chr5:7116738-7122670 FORWARD	Aldehyde oxidase 1	0.496681	0.00041686	0.019905	0.22077	0.848641	0.998351	0.00803496	0.012021	0.562283
VvA8H-CYP707A1	Abscisic acid 8` hydroxylase (CYP707A1)	-0.338733	0.828802	-0.680225	0.0720796	-2.08888	-1.98285	-0.7497	-1.68038	0.000538493	CHR2_JGVV87_27_T01	VIT_02s0087g00710	26.10	misc.cytochrome P450	Symbols: CYP707A3 | CYP707A3; (+)-abscisic acid 8-hydroxylase/ oxygen binding | chr5:18368642-18370991 REVERSE	ABA 8'-hydroxylase CYP707A1	0.519306	1.66183e-10	0.948275	0.678814	0.0142478	0.00552065	0.730798	0.00723801	0.727082
VvA8H-CYP707A2.1	Abscisic acid 8` hydroxylase (CYP707A2)	-0.1048	0.15862	-0.24596	0.275237	-0.00875356	-0.250659	0.455921	0.304119	#N/A	CHR6_JGVV4_319_T01	VIT_06s0004g05050	26.10	misc.cytochrome P450	Symbols: CYP707A2 | CYP707A2; (+)-abscisic acid 8-hydroxylase/ oxygen binding | chr2:12494851-12499156 REVERSE	Ent-kaurenoic acid oxidase 1	0.801117	0.449956	0.969239	0.0770678	0.0643489	0.0107291	0.473195	0.0952513	0.119256
VvA8H-CYP707A2.2	Abscisic acid 8` hydroxylase (CYP707A2)	#N/A	#N/A	#N/A	#N/A	#N/A	#N/A	#N/A	#N/A	0.0784906	n/a	#N/A	#N/A	#N/A	#N/A	#N/A	#N/A	#N/A	#N/A	#N/A	#N/A	#N/A	#N/A	#N/A	#N/A
VvA8H-CYP707A2.3	Abscisic acid 8` hydroxylase (CYP707A2)	2.0954	3.88364	1.99438	-2.06742	0.0668401	0.52829	0.20072	0.0468658	#N/A	CHR18_JGVV1_715_T01	VIT_18s0001g10500	26.10	misc.cytochrome P450	Symbols: CYP707A4 | CYP707A4; (+)-abscisic acid 8-hydroxylase/ oxygen binding | chr3:6673727-6676520 REVERSE	ABA 8'-hydroxylase CYP707A1	5.7313e-09	3.72176e-14	0.104355	0.00153664	0.941181	0.69127	4.6347e-08	0.034015	0.00796707
VvA8H-CYP707A2.4	Abscisic acid 8` hydroxylase (CYP707A2)	#N/A	#N/A	#N/A	#N/A	#N/A	#N/A	#N/A	#N/A	0.281959	n/a	#N/A	#N/A	#N/A	#N/A	#N/A	#N/A	#N/A	#N/A	#N/A	#N/A	#N/A	#N/A	#N/A	#N/A
VvA8H-CYP707A2.5	Abscisic acid 8` hydroxylase (CYP707A2)	-0.0732566	-0.0752667	0.138133	-0.117091	-0.0873496	0.177965	-0.522843	0.0922343	0.370925	CHR18_JGVV41_8_T01	VIT_18s0041g02390	17.1.1	hormone metabolism.abscisic acid.synthesis-degradation	Symbols: AAO2 | AAO2 (ALDEHYDE OXIDASE 2); aldehyde oxidase | chr3:15512607-15517506 REVERSE	Aldehyde oxidase 1	0.830223	0.0007283	0.865888	0.851396	0.994369	0.961551	0.00650765	0.418722	0.328101
VvA8H-CYP707A2.6	Abscisic acid 8` hydroxylase (CYP707A2)	-0.111295	0.0129561	0.0265477	-0.0504987	0.213368	0.318704	-0.293811	0.289699	-0.00304387	CHR6_JGVV9_252_T01	VIT_06s0009g00770	17.1.1.1.12	hormone metabolism.abscisic acid.synthesis-degradation.synthesis.abscisic aldehyde oxidase	Symbols: AAO3 | AAO3 (Abscisic ALDEHYDE OXIDASE 3); abscisic aldehyde oxidase/ aldehyde oxidase/ indole-3-acetaldehyde oxidase | chr2:11601754-11607161 FORWARD	Aldehyde oxidase 1	0.600803	0.000446726	0.896026	0.0181477	0.0779031	6.00024e-06	5.15648e-05	0.0295374	0.0236326
VvA8H-CYP707A4	Abscisic acid 8` hydroxylase (CYP707A4)	-0.00291191	-1.0111	-0.820817	0.255639	-0.277115	-0.184329	-0.619931	-0.785627	-2.98233	CHR3_JGVV63_36_T01	VIT_03s0063g00380	26.10	misc.cytochrome P450	Symbols: CYP707A4 | CYP707A4; (+)-abscisic acid 8-hydroxylase/ oxygen binding | chr3:6673727-6676520 REVERSE	ABA 8'-hydroxylase CYP707A1	0.998182	0.0450312	0.848808	0.995739	0.838563	0.444554	0.00051553	0.270117	0.00141796
VvCCD4a	(9,10) (9`,10`) cleavage dioxygenase (CCD4)	-0.500498	-1.15588	-1.84262	0.0159179	-0.832065	-3.25694	-0.86538	-0.927686	0.65595	CHR2_JGVV87_11_T01	VIT_02s0087g00910	17.1.1.1.10	hormone metabolism.abscisic acid.synthesis-degradation.synthesis.9-cis-epoxycarotenoid dioxygenase	Symbols: NCED4 | NCED4 (NINE-CIS-EPOXYCAROTENOID DIOXYGENASE 4) | chr4:10481786-10483857 FORWARD	9-cis-epoxycarotenoid dioxygenase	0.274993	1.66851e-13	0.0227024	7.35752e-05	0.206999	0.539054	0.404569	0.0156417	0.00136782
VvCCD4b	(9,10) (9`,10`) cleavage dioxygenase (CCD4)	0.198351	0.392798	-0.0102068	-0.643035	0.475531	1.03497	-0.0550169	0.419993	-0.203868	CHR2_JGVV87_9_T01	VIT_02s0087g00930	17.1.1.1.10	hormone metabolism.abscisic acid.synthesis-degradation.synthesis.9-cis-epoxycarotenoid dioxygenase	Symbols: NCED4 | NCED4 (NINE-CIS-EPOXYCAROTENOID DIOXYGENASE 4) | chr4:10481786-10483857 FORWARD	9-cis-epoxycarotenoid dioxygenase	0.682979	1.8483e-09	0.00829372	4.46724e-05	0.000575753	0.380462	0.437795	0.008091	0.0680684
VvCCD4c	(9,10) (9`,10`) cleavage dioxygenase (CCD4)	0.031647	0.0380788	0.111121	-0.121818	0.0700957	0.0399661	0.123547	0.00241925	0.0626545	CHR16_JGVV39_78_T01	VIT_16s0039g01370	17.1.1.1.10	hormone metabolism.abscisic acid.synthesis-degradation.synthesis.9-cis-epoxycarotenoid dioxygenase	Symbols: NCED4 | NCED4 (NINE-CIS-EPOXYCAROTENOID DIOXYGENASE 4) | chr4:10481786-10483857 FORWARD	Carotenoid cleavage dioxygenase 4b	0.93683	1.74653e-06	0.570342	0.0146288	0.81241	0.234955	0.0733054	0.031998	0.0268414
VvCCD1.1	(5,6) (5`,6`) (9,10) (9`,10`) cleavage dioxygenase (CCD1)	-0.141482	0.140621	-0.0717046	-0.0936568	-0.264229	-0.0576808	-0.118751	-0.180262	-0.0835554	CHR13_JGVV64_95_T01	VIT_13s0064g00810	16.1.4.10	secondary metabolism.isoprenoids.carotenoids.carotenoid cleavage dioxygenase	Symbols: CCD1, ATCCD1, ATNCED1, NCED1 | CCD1 (CAROTENOID CLEAVAGE DIOXYGENASE 1); 9-cis-epoxycarotenoid dioxygenase | chr3:23452911-23456078 FORWARD	9,10[9',10']carotenoid cleavage dioxygenase [Vitis vinifera]	0.436293	0.00038671	4.64458e-05	1.15785e-06	0.00106848	0.0108185	0.00189806	0.000271171	0.0124799
VvCCD1.2	(5,6) (5`,6`) (9,10) (9`,10`) cleavage dioxygenase (CCD1)	-0.0940581	0.290576	0.0115007	-0.145353	-0.240563	-0.0694386	-0.119077	-0.141606	-0.214293	CHR13_JGVV64_94_T01	VIT_13s0064g00840	16.1.4.10	secondary metabolism.isoprenoids.carotenoids.carotenoid cleavage dioxygenase	Symbols: CCD1, ATCCD1, ATNCED1, NCED1 | CCD1 (CAROTENOID CLEAVAGE DIOXYGENASE 1); 9-cis-epoxycarotenoid dioxygenase | chr3:23452911-23456078 FORWARD	9,10[9',10']carotenoid cleavage dioxygenase	0.584755	2.84534e-14	0.00319815	0.24959	0.300757	0.000651568	0.980113	0.0174515	0.0184175
VvCCD7	(9`,10`) cleavage dioxygenase (CCD7; MAX3)	-0.453761	-0.128927	0.0858568	-0.163971	0.181755	-0.0426369	-0.484367	-0.223181	0.145665	CHR15_JGVV21_57_T01	VIT_15s0021g02190	17.1.1	hormone metabolism.abscisic acid.synthesis-degradation	Symbols: CCD7, MAX3, ATCCD7 | CCD7 (CAROTENOID CLEAVAGE DIOXYGENASE 7); 9-cis-epoxycarotenoid dioxygenase | chr2:18558938-18561621 FORWARD	Carotenoid cleavage dioxygenase 7, chloroplast(AtCCD7) (AtNCED7)	0.102815	3.93945e-12	0.020176	0.929747	0.447207	0.726606	0.51674	0.562231	0.411021
VvCCD8	(13,14) cleavage dioxygenase (CCD8; MAX4)	-0.153089	0.105548	-0.0608016	-0.151136	0.0655682	0.0170881	0.544538	0.365258	0.50156	CHR4_JGVV8_318_T01	VIT_04s0008g03380	17.1.1	hormone metabolism.abscisic acid.synthesis-degradation	Symbols: CCD8, MAX4, ATCCD8 | CCD8 (CAROTENOID CLEAVAGE DIOXYGENASE 8); oxidoreductase, acting on single donors with incorporation of molecular oxygen, incorporation of two atoms of oxygen | chr4:15828228-15831485 FORWARD	Carotenoid cleavage dioxygenase 8	0.613918	8.99311e-06	0.929829	0.836854	0.332147	0.00568762	0.00541226	0.0216314	0.00263057
VvMAX1	cytochrome P450 (CYP711A1; MAX1)	0.151486	-0.816444	0.285495	0.501522	0.592965	0.595142	0.172173	0.399122	0.51	CHR4_JGVV8_99_T01	VIT_04s0008g01100	17.2.2	hormone metabolism.auxin.signal transduction	Symbols: CYP711A1, MAX1 | CYP711A1; electron carrier/ heme binding / iron ion binding / monooxygenase/ oxygen binding | chr2:11140809-11143360 FORWARD	CYP706A12	0.792917	0.00134698	0.000394672	2.96662e-05	1.74358e-05	2.67322e-05	8.02178e-06	1.13569e-05	0.0300663
	Abscisic acid receptor PYL9 RCAR1	-0.0979857	-1.08682	-0.324403	0.782552	-0.801196	-0.92433	-0.338236	-0.155559	-0.0372874		VIT_15s0046g01050	35.2	unknown protein | chr1:141971-143183 FORWARD	Abscisic acid receptor PYL9 RCAR1
	Abscisic acid receptor PYL4 RCAR10	0.14	-0.65	-0.06	0.4	0.65	-0.66	0.88	1.01	1.38		VIT_08s0058g00470	35.1	unknown protein | chr2:16050063-16051168 FORWARD	Abscisic acid receptor PYL4 RCAR10
	GCR2-like 1 ABA receptor	-0.297994	-1.25902	-1.15332	0.110362	0.322905	0.288239	0.313017	0.638263	0.402787		VIT_07s0191g00080	35.1	not assigned.no ontology	Symbols: GCL1 | GCL1 (GCR2-LIKE 1); catalytic | chr5:26085973-26088153 REVERSE
	GCR2-like 1 ABA receptor	-0.440671	-1.60369	-1.42834	-0.0502672	0.437877	0.293948	0.673186	0.778529	0.409364		VIT_00s0710g00010	35.1	not assigned.no ontology	Symbols: GCL1 | GCL1 (GCR2-LIKE 1); catalytic | chr5:26085973-26088153 REVERSE
		0.150044	0.94907	-0.0394179	4.99763	-0.763563	-3.39358	4.22914	1.70126	1.19627		VIT_03s0017g01990	26.2	misc.UDP glucosyl and glucoronyl transferases	UDP-glucoronosyl/UDP-glucosyl transferase family protein | chr3:7667027-7668724 FORWARD
